# Supplementary material for: Molecular characterization of Pectobacterium atrosepticum infecting potato and its management through chemicals
Source: PeerJ. 2024 Jun 28;12:e17518. doi: 10.7717/peerj.17518 (PMC11216208; doi:10.7717/peerj.17518)
Supplement: Supplemental Information 1 [file peerj-12-17518-s001.xlsx]

## Sheet: Sheet1
Replications	Treatments	Concentrations	Inhibition(%)
1	1	1	8
1	1	2	18
1	1	3	11
1	2	1	7
1	2	2	6.7
1	2	3	9.4
1	3	1	10
1	3	2	10.5
1	3	3	9.5
1	4	1	16.5
1	4	2	16
1	4	3	17
1	5	1	6.1
1	5	2	6.6
1	5	3	6.9
1	6	1	7.75
1	6	2	7.85
1	6	3	7.5
1	7	1	0
1	7	2	0
1	7	3	0
2	1	1	7.5
2	1	2	20
2	1	3	16
2	2	1	8.3
2	2	2	7.2
2	2	3	7.5
2	3	1	9.5
2	3	2	10
2	3	3	11.5
2	4	1	15.5
2	4	2	18.75
2	4	3	18.25
2	5	1	6.9
2	5	2	7.4
2	5	3	9.2
2	6	1	7.68
2	6	2	6.8
2	6	3	7.83
2	7	1	0
2	7	2	0
2	7	3	0
3	1	1	9
3	1	2	19.5
3	1	3	15
3	2	1	7.5
3	2	2	7.8
3	2	3	8.6
3	3	1	9.5
3	3	2	10
3	3	3	11
3	4	1	17.25
3	4	2	16.25
3	4	3	18.75
3	5	1	6.9
3	5	2	7.4
3	5	3	6.2
3	6	1	7.16
3	6	2	8.5
3	6	3	7.95
3	7	1	0
3	7	2	0
3	7	3	0
