# Supplementary material for: Molecular characterization of Pectobacterium atrosepticum infecting potato and its management through chemicals
Source: PeerJ. 2024 Jun 28;12:e17518. doi: 10.7717/peerj.17518 (PMC11216208; doi:10.7717/peerj.17518)
Supplement: Supplemental Information 2 [file peerj-12-17518-s002.xlsx]

## Sheet: in-vitro 1
Treatment	Inhibition Zone(mm)
Air one	13.778b
Blue Copper	7.7778cd
Profiler	10.167c
Cordate	17.139a
Strider	7.0667d
Spot Fix	7.6689cd
Control	0.00e

## Sheet: in-vitro (TxC)
	Inhibition Zone (mm)
Treatment	Concentration (ppm)
	100	200	300
Air one	8.16667	19.1667	14
Blue Copper	7.6	7.23333	8.5
Profiler	9.66667	10.1667	10.6667
Cordate	16.4167	17	18
Strider	6.63333	7.13333	7.43333
Spot Fix	7.53	7.71667	7.76
Control	0	0	0

## Sheet: In-vivo 1
Treatment	Disease incidence %
Air one	16.98cd
Blue Copper	17.49d
Profiler	21.45c
Cordate	14.76e
Strider	24.99b
Spot Fix	20.67c
Control	43.00a

## Sheet: In-vivo (TxC)
	Disease incidence %
Treatment	Concentration (ppm)
	100	200	300
Air one	18.89	17.31	14.73
Blue Copper	19.06	18.14	15.28
Profiler	25.26	20.79	18.37
Cordate	16.73	15.64	11.89
Strider	29.17	23.81	21.95
Spot Fix	22.36	20.58	19.08
Control	43	43	43
